# Supplementary material for: SHP2 Drives Adaptive Resistance to ERK Signaling Inhibition in Molecularly Defined Subsets of ERK-Dependent Tumors
Source: PubMed Central journal article supplement — Cell Rep. Author manuscript; Available in PMC 2019 Mar 1. (PMC6396678; doi:10.1016/j.celrep.2018.12.013), 2019-01-02
Supplement: NIHMS1013350-supplement-Supplemental.pdf [file NIHMS1013350-supplement-Supplemental.pdf]

**Cell Reports, Volume 26**

**Supplemental Information**

**SHP2 Drives Adaptive Resistance to ERK**

**Signaling Inhibition in Molecularly Defined**

**Subsets of ERK-Dependent Tumors**

**Tamer A. Ahmed, Christos Adamopoulos, Zoi Karoulia, Xuewei Wu, Ravi Sachidanandam, Stuart A. Aaronson, and Poulikos I. Poulikakos**

| Compound (Selectivity)          | Chemical structure | Compound (Selectivity)                                           | Chemical structure |
|---------------------------------|--------------------|------------------------------------------------------------------|--------------------|
| Trametinib (MEK1/2)             |                    | Cabozantinib (VEGFR2, c-Met, Ret, Kit, Flt-1/3/4, Tie2, and AXL) |                    |
| SHP099 (SHP2)                   |                    | R428 (AXL)                                                       |                    |
| Lapatinib (EGFR and HER2)       |                    | GSK 1904529A (IGF-1R and IR)                                     |                    |
| Gefitinib (EGFR)                |                    | Ponatinib (Abl, PDGFRα, VEGFR2, Src and FGFR1/2/3)               |                    |
| AZD 8931 (EGFR, HER2, and HER3) |                    | BGJ398 (FGFR1/2/3)                                               |                    |
| Crizotinib (C-Met and ALK)      |                    | Vemurafenib (RAF)                                                |                    |
| Dabrafenib (RAF)                |                    |                                                                  |                    |

Supplemental Figure 1. Chemical structure and reported selectivity of each compound used in the study. Related to Figures 1-6.

**A**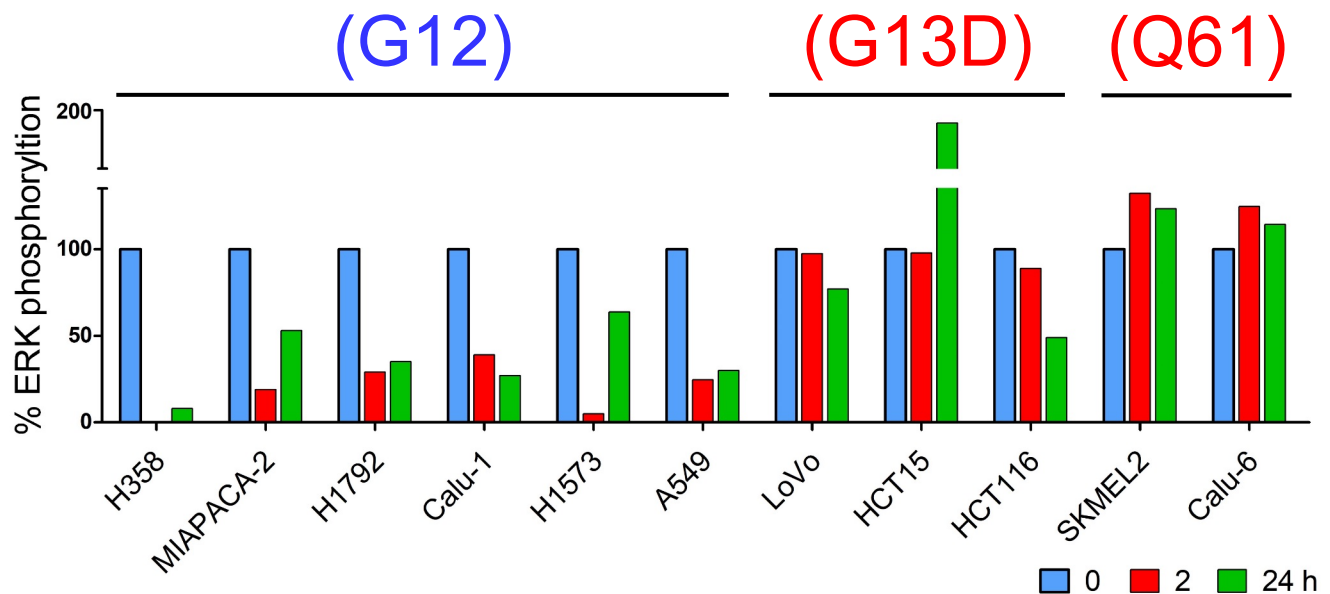**B**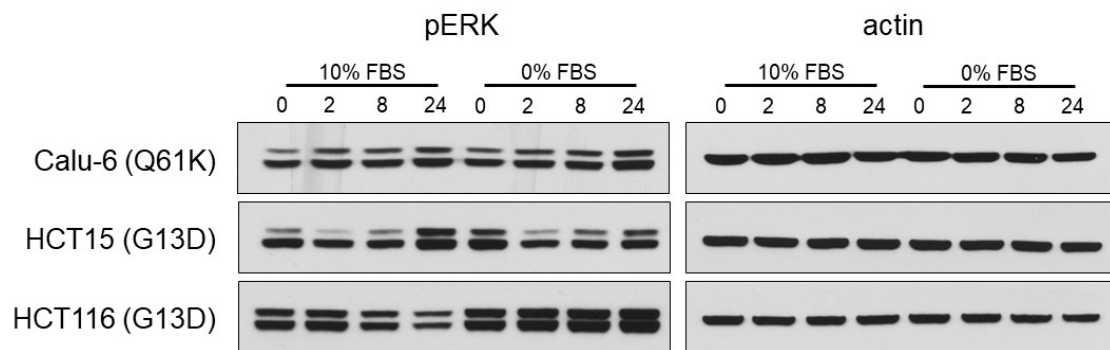**C**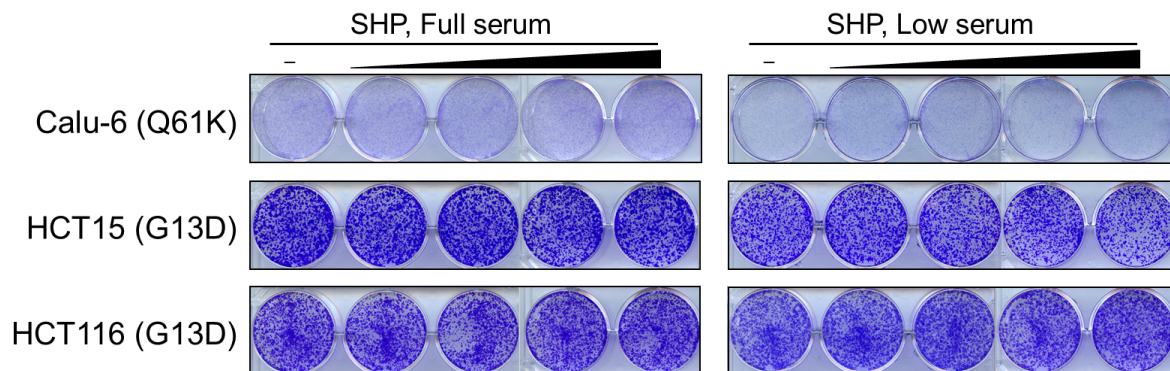

**Supplemental Figure 2. Effect of SHP099 on RAS-mutant cell lines. Related to Figure 3.** (A) Quantitation of ERK phosphorylation in RAS (G12X), RAS (G13D) and RAS (Q61X) treated with SHP099 (10  $\mu$ M) for 2 and 24 hours (From **Figure 3B**). pERK expression was normalized to actin and calculated as a percentage change relative to the control (0 h). (B) KRAS (G13D) and KRAS (Q61K)-mutant cell lines were treated with SHP099 (10  $\mu$ M) for the indicated time points under either serum-free or full (10% v/v FBS) serum conditions. ERK activity was monitored for 24 hours by immunoblotting with the indicated antibodies. (C) Crystal violet cell growth assays of the indicated KRAS (G13D) and KRAS (Q61K)-mutant cell lines treated with SHP099 (0.5, 1, 2 and 5  $\mu$ M), under either serum-free or full (10% v/v FBS) serum conditions.

**A**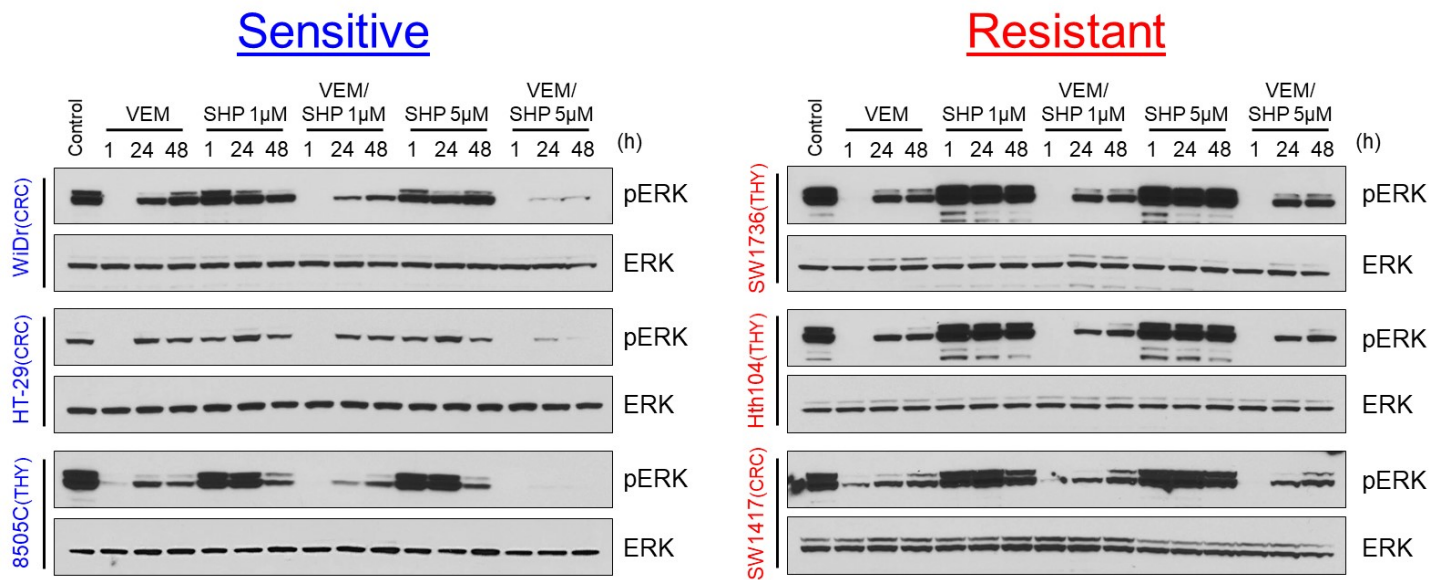**B**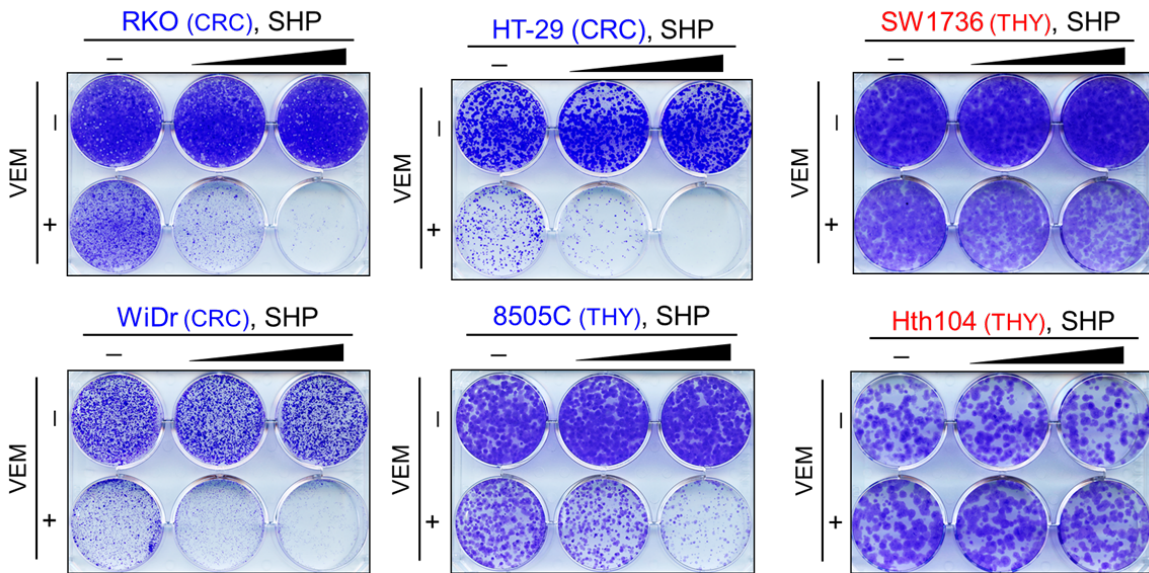**C**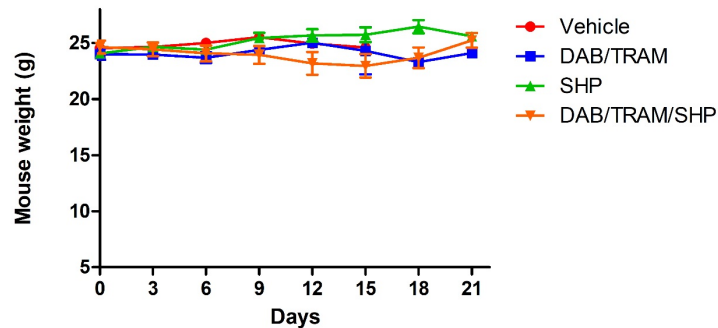

**Supplemental Figure 3. Differential sensitivity to SHP2 inhibition in colorectal or thyroid BRAF (V600E) cells when combined with RAF inhibitor. Related to Figure 4.** (A) The indicated BRAF(V600E) tumor lines were treated with vemurafenib (2 μM), SHP099 (1 and 5 μM) or the combination, and reactivation of ERK signaling was monitored for 48 hours by immunoblotting with the indicated antibodies. 8505C and HT-29 cells were treated with 1 or 3 μM vemurafenib, respectively. (B) Crystal violet cell growth assays assessing the effect of vemurafenib (2 μM), SHP099 (1 and 5 μM) and the combination in the indicated BRAF(V600E) cell lines. (C) Body weight of mice treated with indicated inhibitors was measured every three days. Data are represented as mean +/- SEM.

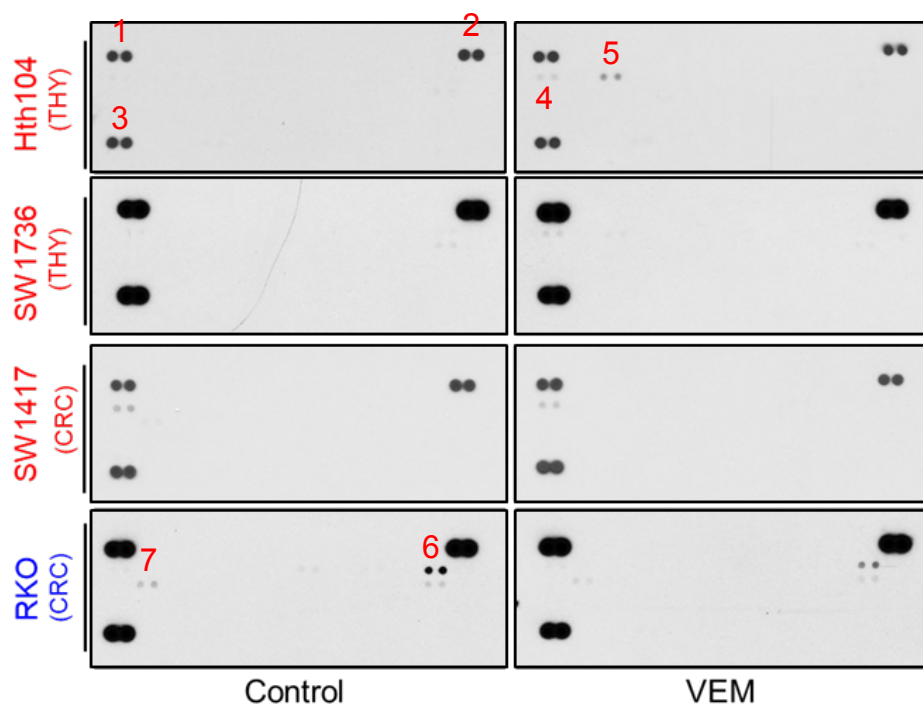

| Number  | Receptor   |
|---------|------------|
| 1, 2, 3 | Reference  |
| 4       | EGFR       |
| 5       | HER3       |
| 6       | AXL        |
| 7       | HGFR (Met) |

Supplemental Figure 4. Lighter exposure of RTK arrays using lysates from the indicated cell lines treated with VEM for 24 hours. Related to Figure 5.

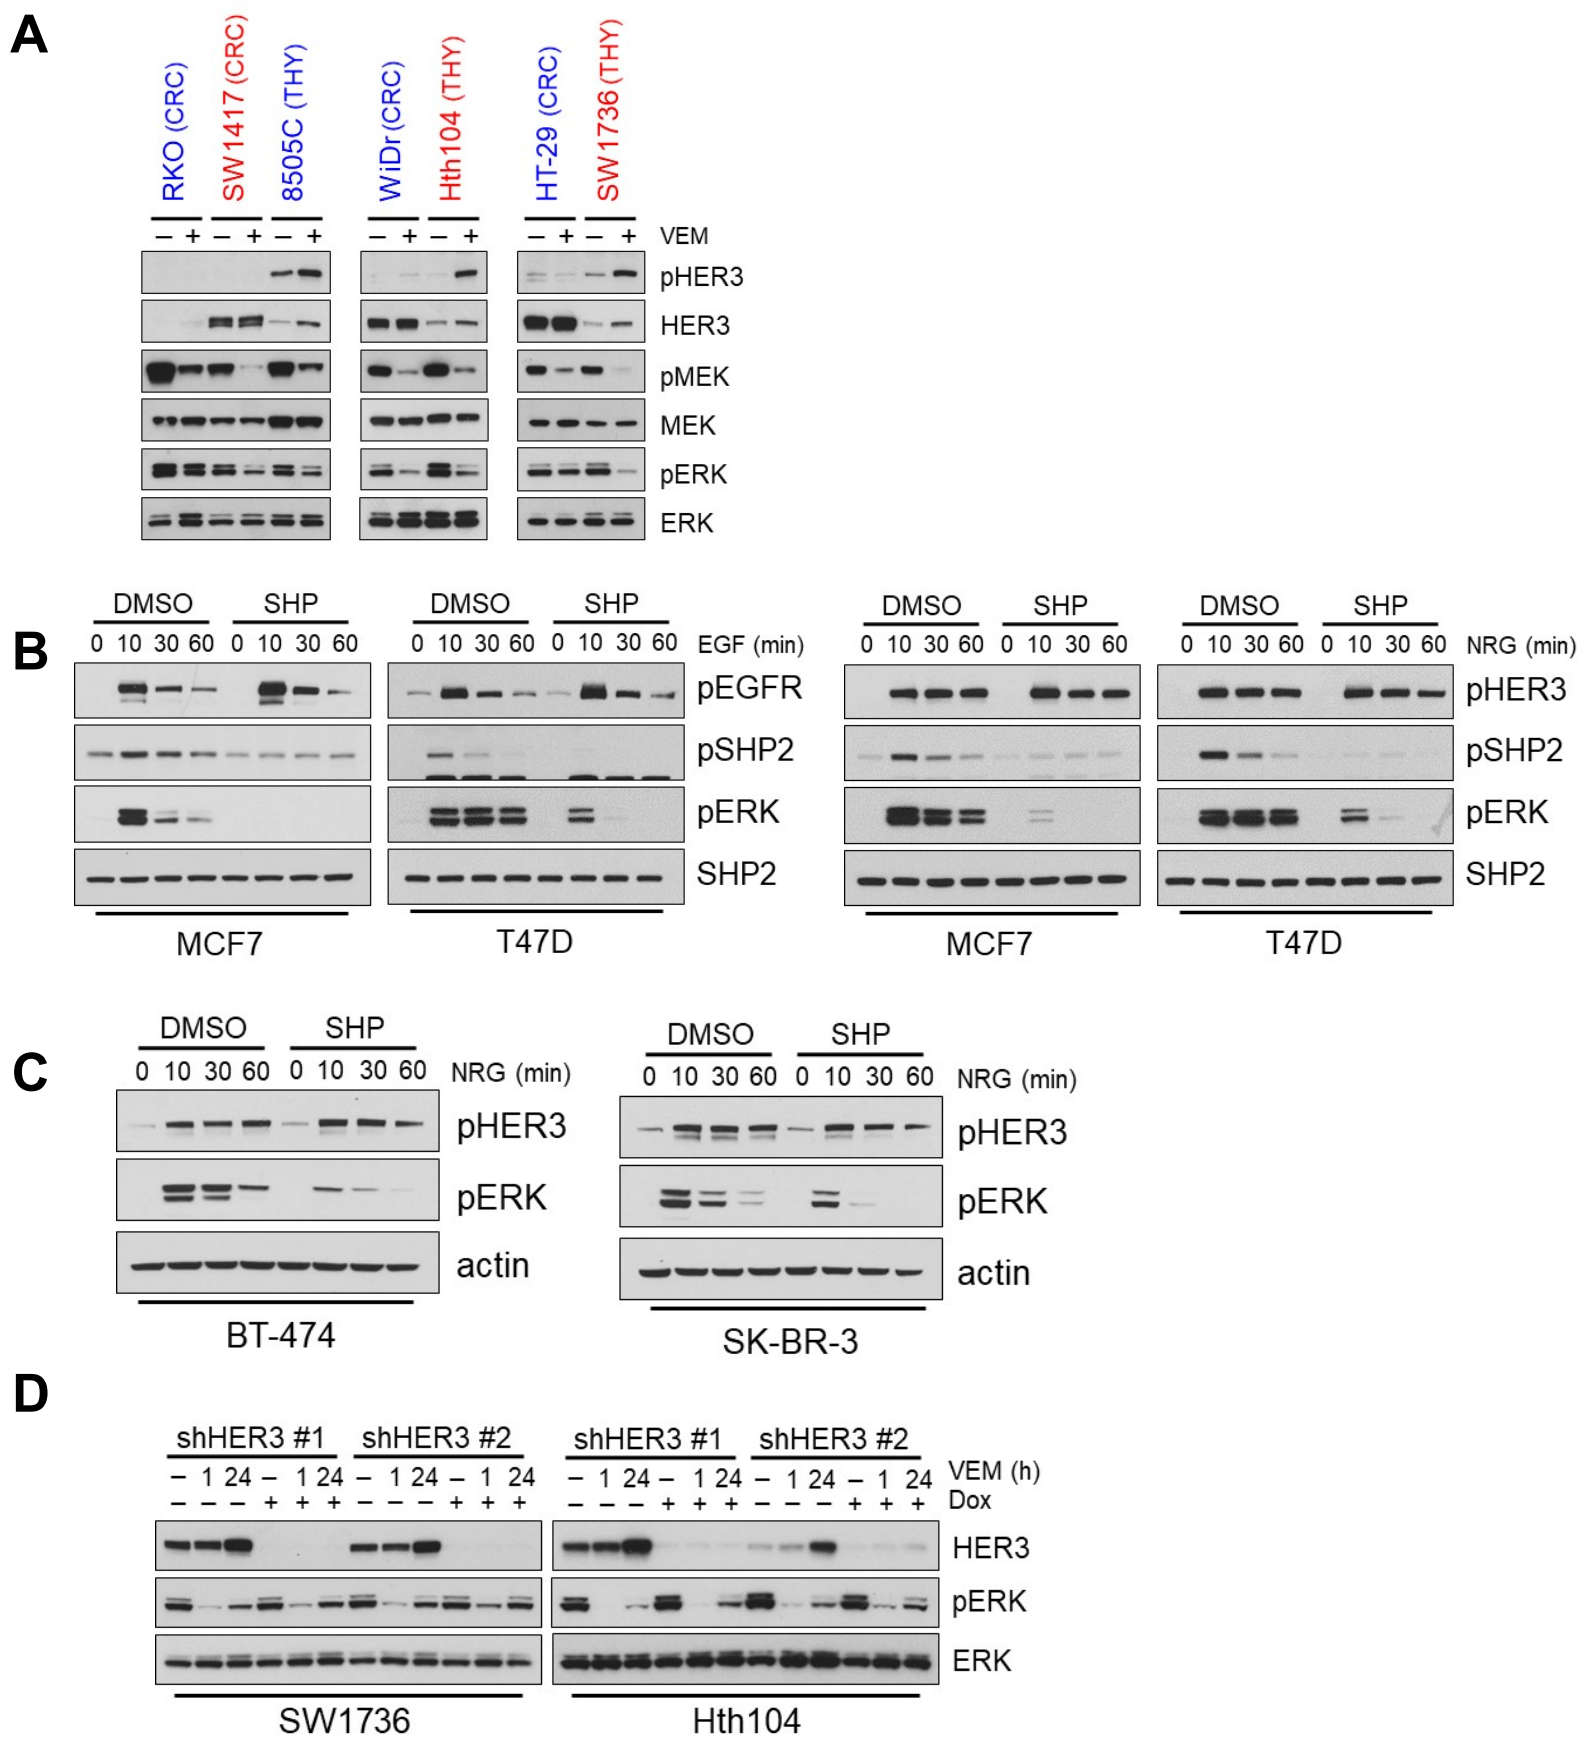

**Supplemental Figure 5. Adaptive resistance to RAF inhibitors in SHP2-negative BRAF(V600E) cancer cells is independent of HER3. Related to Figure 5.** (A) The indicated BRAF(V600E)-expressing tumor cells treated with or without vemurafenib (2  $\mu$ M) for 24 hours. HER3 expression and phosphorylation were detected by immunoblotting. (B) MCF7 or T47D cells pretreated with DMSO or SHP099 (10  $\mu$ M) for 1 hour, then stimulated with either epidermal growth factor (EGF, 10 ng/mL) or neuregulin (NRG, 5 ng/mL) for the indicated time points. (C) BT474 or SK-BR-3 cells pretreated with either DMSO or SHP099 (10  $\mu$ M) for 1 hour then neuregulin (NRG, 5 ng/mL) were added for the indicated time points. (D) SW1736 or Hth104 cells transduced with doxycycline-inducible shRNAs targeting HER3 were treated with vemurafenib (2  $\mu$ M) and doxycycline for the times indicated. HER3 expression and ERK rebound were assessed by immunoblotting.

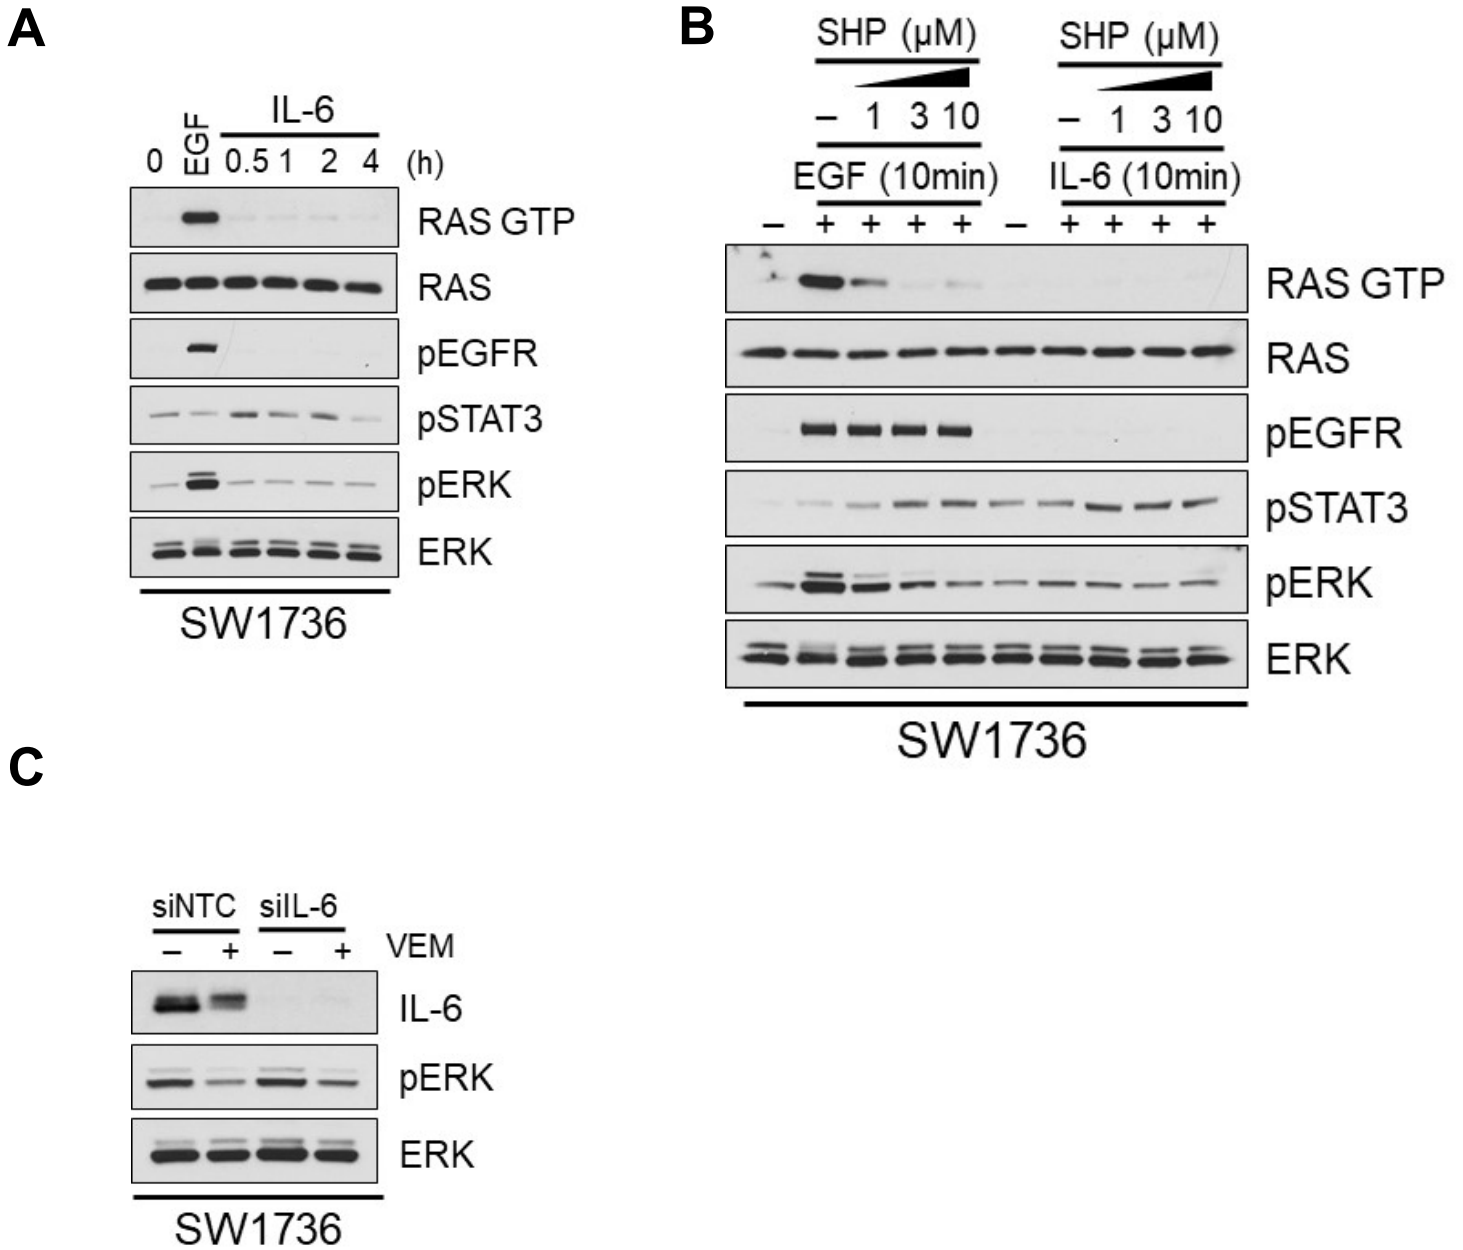

**Supplemental Figure 6. Autocrine IL-6 does not drive feedback-induced RAS activity in SW1736 cells. Related to Figure 6.** (A) IL-6 (50 ng/mL) was added at the indicated time points in SW1736 cells, then lysates were either subjected to RAS-GTP pull-down assay or immunoblotted with the indicated antibodies. (B) SW1736 cells were pretreated with SHP099 (10 μM) for 1 hour then EGF or IL-6 were added for the indicated time points. Cell lysates were either subjected to RAS-GTP pull-down assay or immunoblotted with the indicated antibodies. (C) SW1736 cells were transfected with non-targeting control or IL-6 siRNAs (100 nM) for 24 hours then treated for additional 24 hours with vemurafenib (2 μM). IL-6 expression and ERK phosphorylation were assessed by immunoblotting.

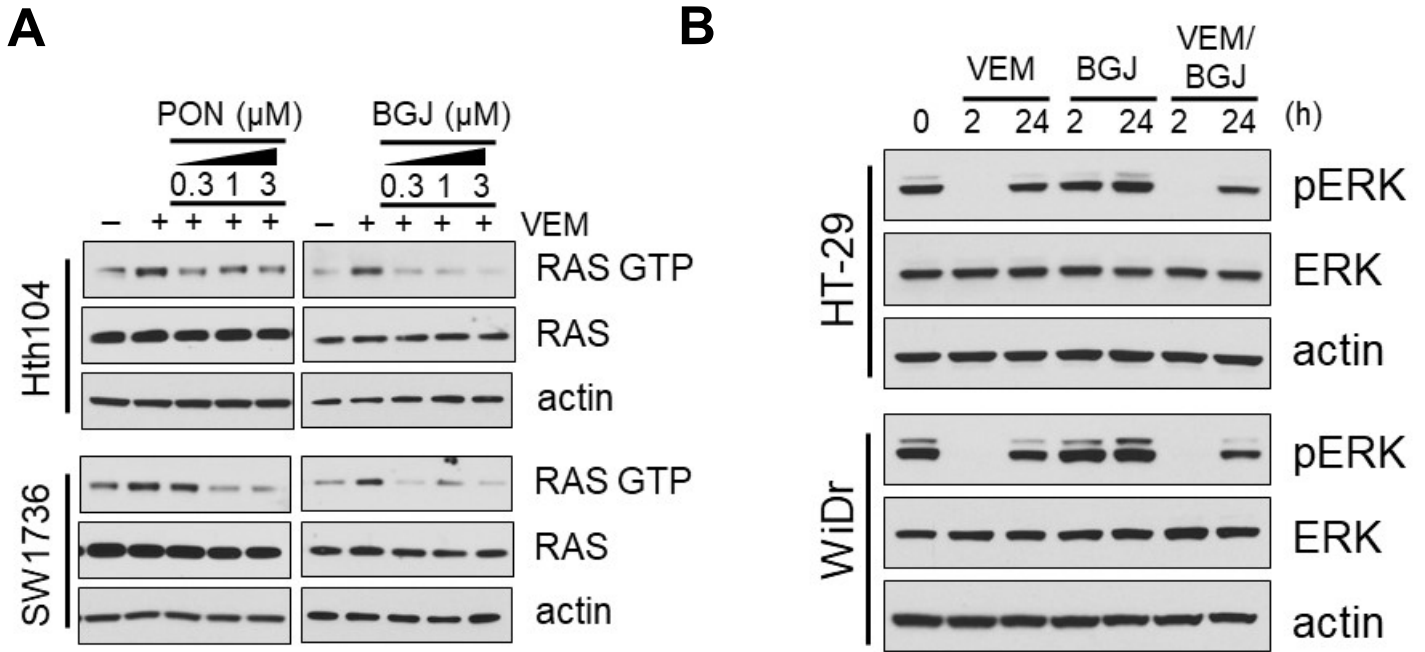

**Supplemental Figure 7. Effect of VEM and BGJ combination in BRAF(V600E) colorectal and thyroid tumor cells. Related to Figure 6.** (A) Hth104 or SW1736 cells were treated with VEM (2  $\mu\text{M}$ ) for 48 hours followed by PON or BGJ for 2 hours at the indicated concentrations, then subjected to RAS-GTP pull-down assay. (B) HT-29 or WiDr cells were treated with 2  $\mu\text{M}$  VEM combined with BGJ (5  $\mu\text{M}$ ) for 24 hours. ERK phosphorylation was assessed by immunoblotting.
